# Supplementary material for: Realization of High Current Gain for Van der Waals MoS2/WSe2/MoS2 Bipolar Junction Transistor
Source: MDPI journal article supplement (doi:10.3390/nano14080718), 2024-04-19
Supplement: s1 [file s1]

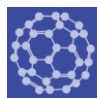

Supplementary Material

# Realization of High Current Gain for Van der Waals MoS<sub>2</sub>/WSe<sub>2</sub>/MoS<sub>2</sub> Bipolar Junction Transistor

Zezhang Yan, Ningsheng Xu and Shaozhi Deng \*

State Key Laboratory of Optoelectronic Materials and Technologies, Guangdong Province Key Laboratory of Display Material and Technology, School of Electronics and Information Technology, Sun Yat-sen University, Guangzhou 510275, China

\* Correspondence: stdsz@mail.sysu.edu.cn (S.D.)

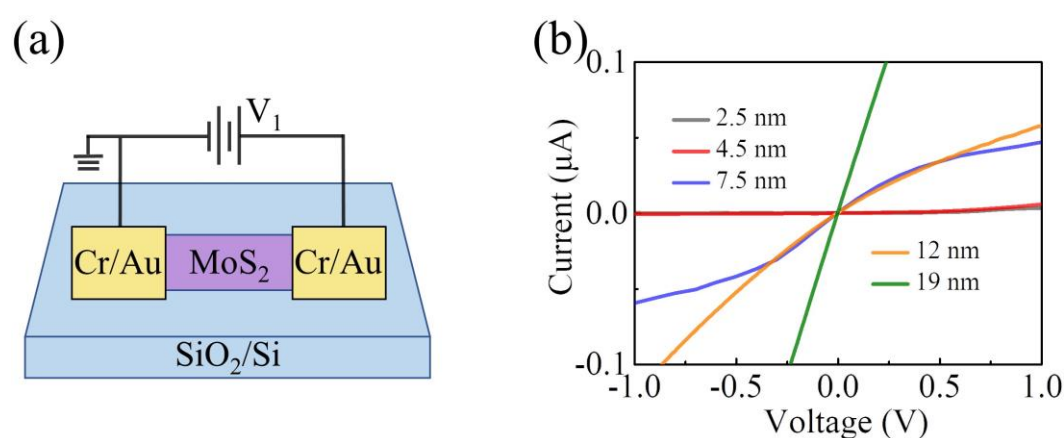

**Figure S1.** (a) A schematic illustration of the electrical connection to investigate the electrical characteristics of the undoped MoS<sub>2</sub> flakes with different thicknesses. (b) Typical I-V curves of the undoped MoS<sub>2</sub> flakes with different thicknesses.

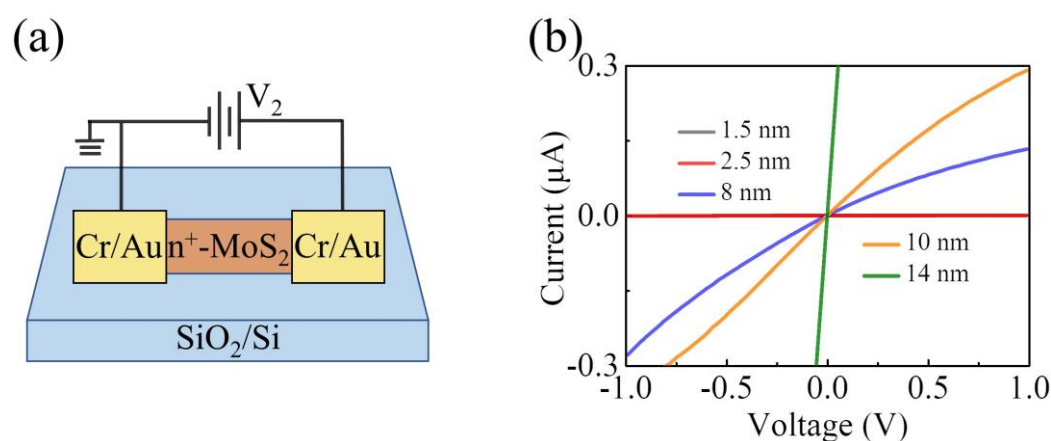

**Figure S2.** (a) A schematic illustration of the electrical connection to investigate the electrical characteristics of the re-doped MoS<sub>2</sub> flakes with different thicknesses. (b) Typical I-V curves of the re-doped MoS<sub>2</sub> flakes with different thicknesses.

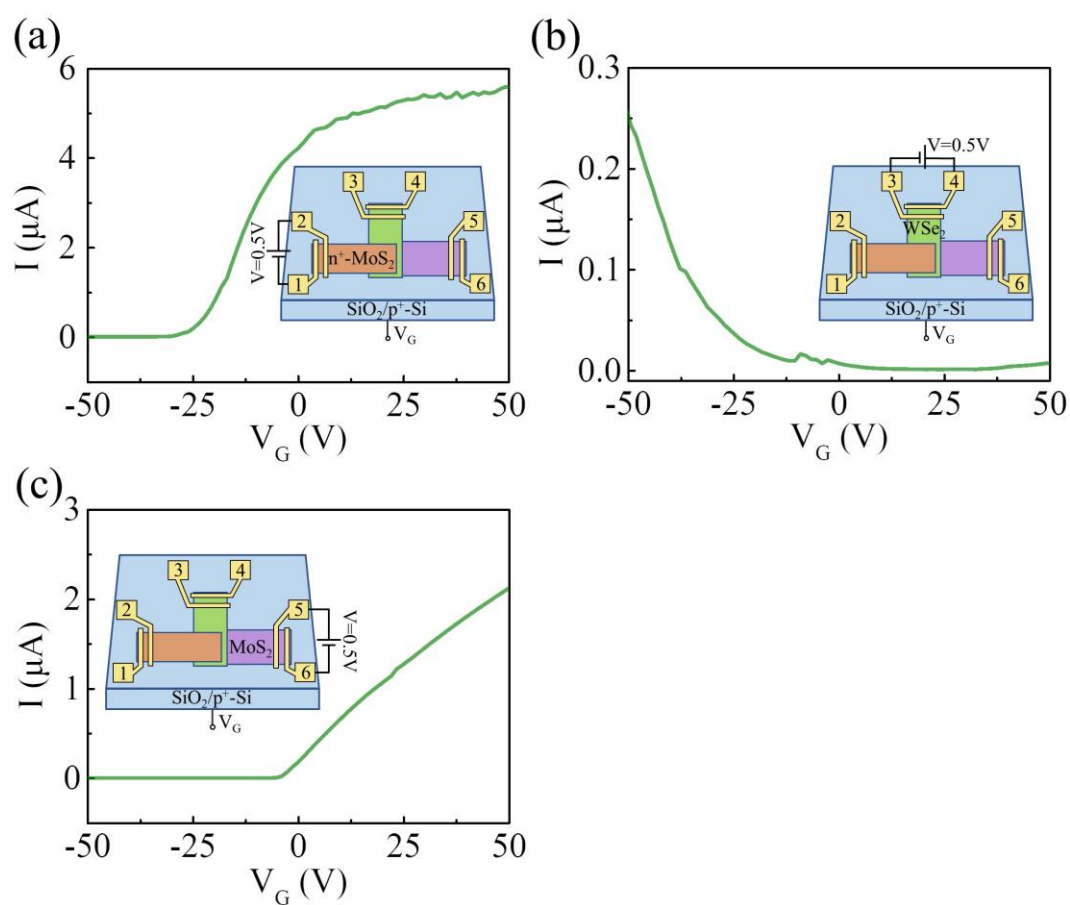

**Figure S3.** (a) The transfer curve of the individual  $n^+\text{-MoS}_2$  flake; (b) The transfer curve of the individual  $\text{WSe}_2$  flake; (c) The transfer curve of the individual  $\text{MoS}_2$  flake.

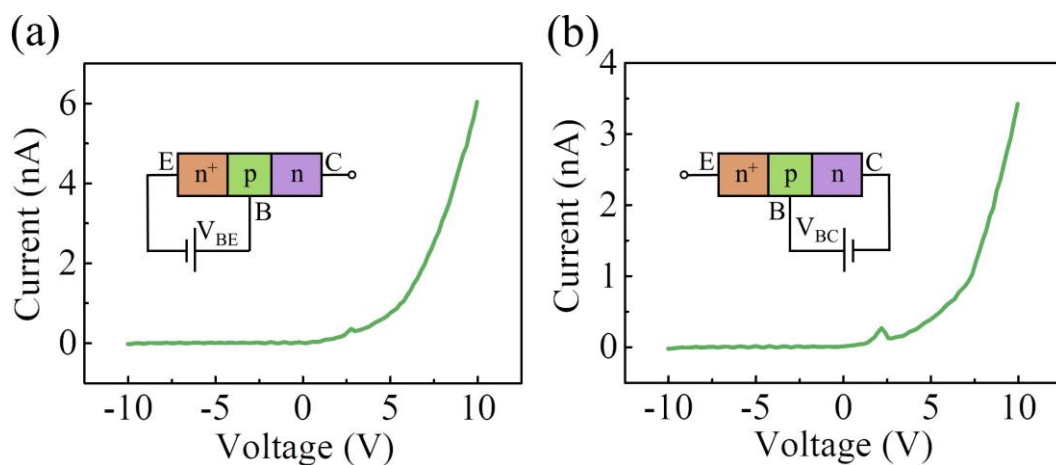

**Figure S4.** (a) I-V curves of the base-emitter (top- $n^+\text{-MoS}_2/\text{WSe}_2$ ) junction; (b) I-V curves of the base-collector (bottom- $\text{MoS}_2/\text{WSe}_2$ ) junction.

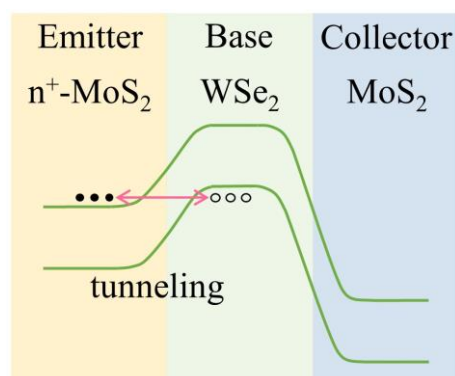

**Figure S5.** Band diagram of the n<sup>+</sup>-MoS<sub>2</sub>/WSe<sub>2</sub>/MoS<sub>2</sub> bipolar junction transistor operating in the negative differential resistance region

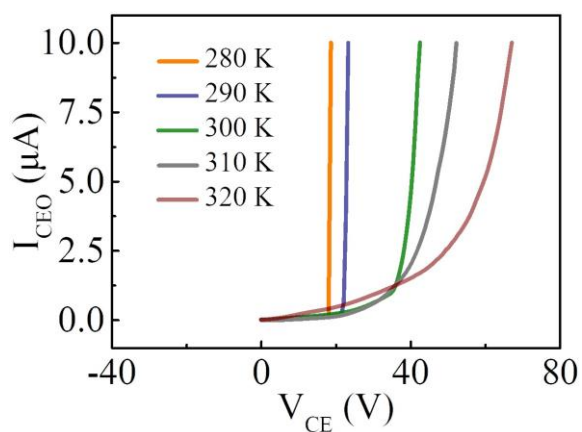

**Figure S6.** The open-base collector-emitter breakdown characteristics of the device operating at different temperatures (from 280 K to 320 K).
